# Supplementary material for: Aortic Root Remodeling as an Indicator for Diastolic Dysfunction and Normative Ranges in Asians: Comparison and Validation with Multidetector Computed Tomography
Source: PubMed Central journal article supplement (PMC7555013; doi:10.3390/diagnostics10090712), 2020-09-18
Supplement: diagnostics-10-00712-s001.pdf [file diagnostics-10-00712-s001.pdf]

## Supplemental Materials

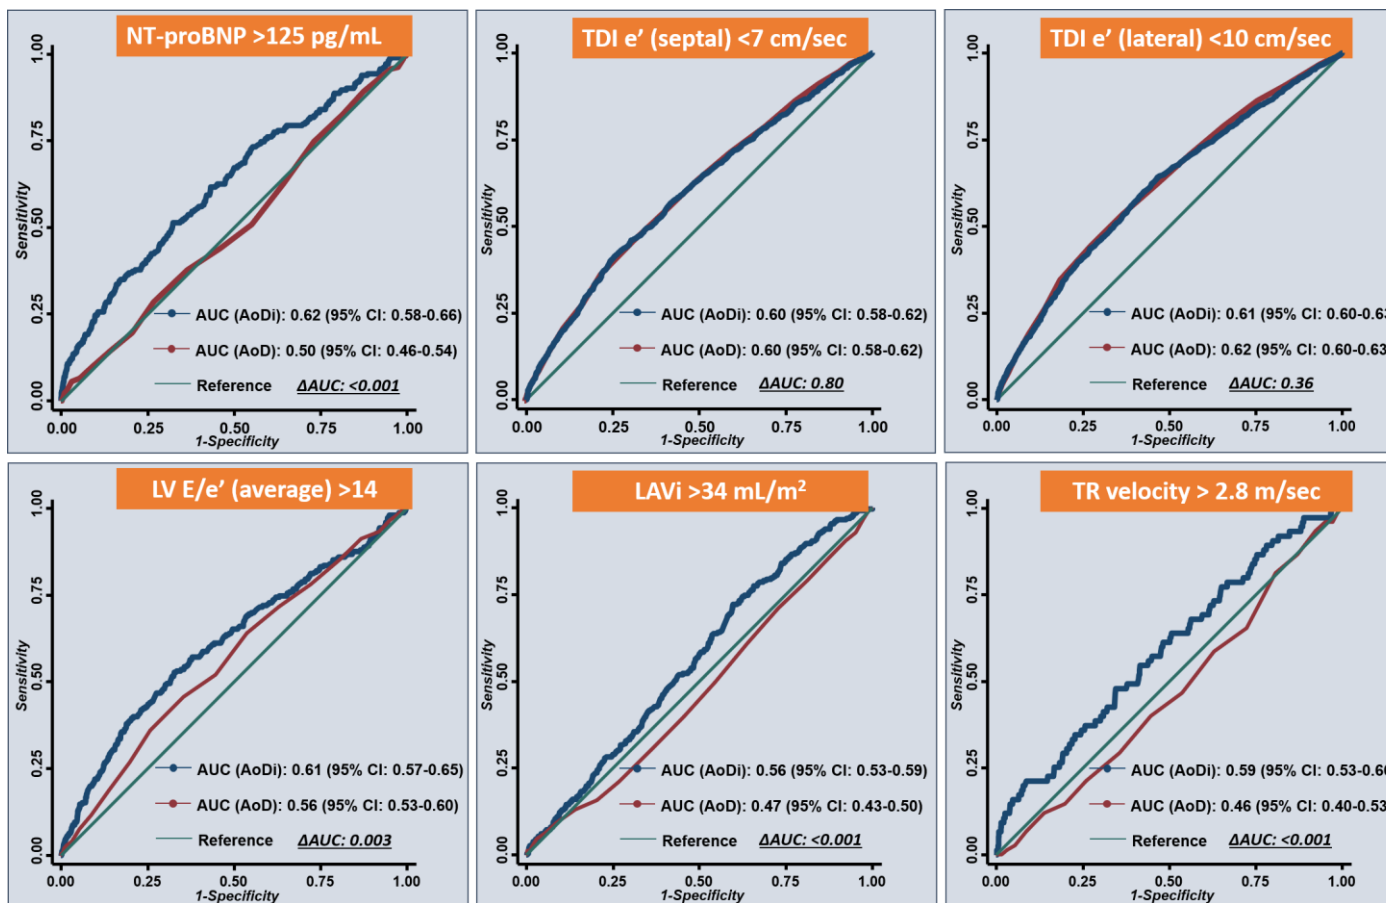

**Figure S1.** Receiver Operating curves (ROC) for NT-proBNP level and diastolic dysfunction parameters according to criteria recommended by ASE guideline.

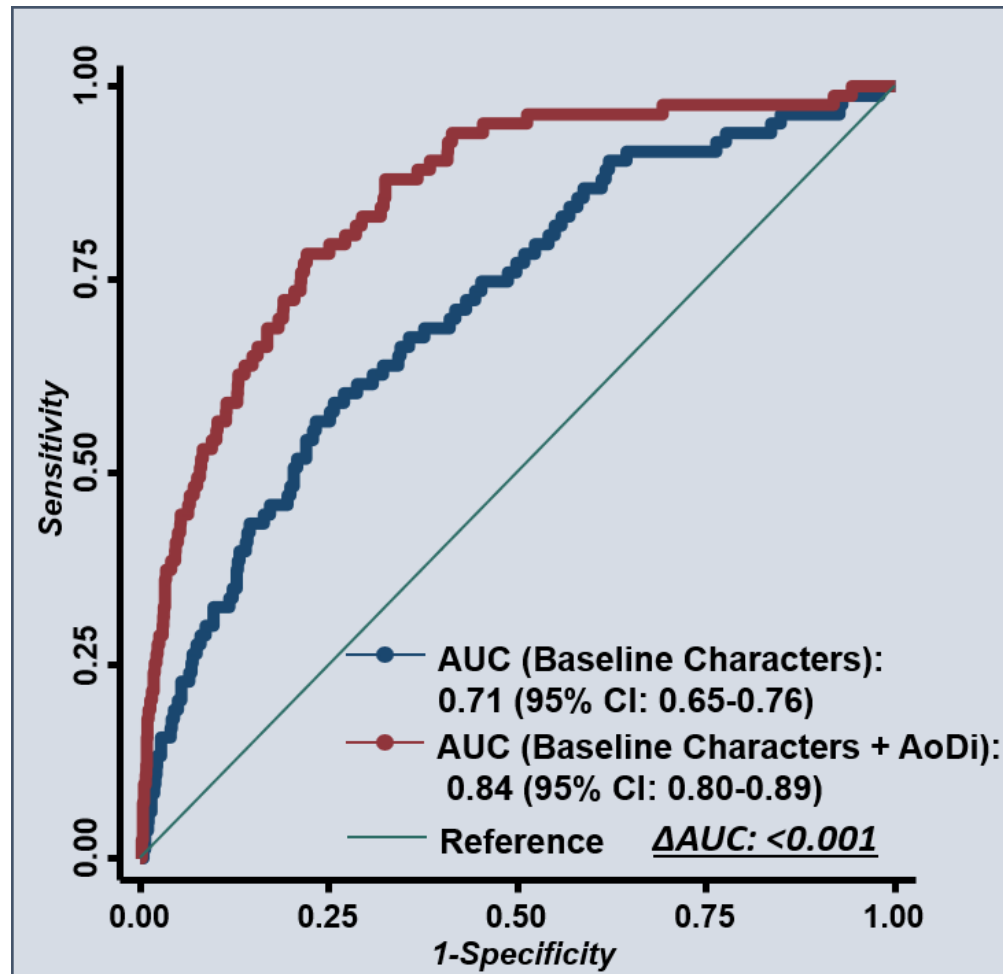

**Figure S2.** Receiver Operating curves (ROC) for diastolic dysfunction (DD) according to criteria recommended by ASE guideline. Baseline clinical characters included age, sex, heart rate, BMI, medical history of hypertension, diabetes, CAD, active smoking and eGFR.

**Table S1.** Baseline characteristics of the study population stratified by aortic root diameter.

| <b>AoD Quintiles</b>            | <b>1st Quintile</b>               | <b>2nd Quintile</b>             | <b>3rd Quintile</b>             | <b>4th Quintile</b>              | <b>5th Quintile)</b>          | <b><i>p</i> (Trend)</b> |
|---------------------------------|-----------------------------------|---------------------------------|---------------------------------|----------------------------------|-------------------------------|-------------------------|
| <b>Range</b>                    | <b>(&lt;30) (<i>n</i> = 1481)</b> | <b>(30–31) (<i>n</i> = 982)</b> | <b>(32–33) (<i>n</i> = 968)</b> | <b>(34–36) (<i>n</i> = 1161)</b> | <b>(≥37) (<i>n</i> = 748)</b> |                         |
| Age, y                          | 46.6 ± 11.6                       | 48.0 ± 11.1                     | 49.1 ± 10.5                     | 50.0 ± 10.8                      | 52.5 ± 10.5                   | <0.001                  |
| Male sex, %                     | 418 (28.3%)                       | 595 (60.8%)                     | 741 (76.7%)                     | 713 (85.4%)                      | 992 (93.3%)                   | <0.001                  |
| Height, cm                      | 160.3 ± 7.80                      | 164.8 ± 8.31                    | 166.9 ± 8.21                    | 168.4 ± 7.97                     | 169.6 ± 7.22                  | <0.001                  |
| Weight, kg                      | 58.5 ± 10.4                       | 65.1 ± 11.0                     | 69.2 ± 11.2                     | 71.3 ± 12.1                      | 74.7 ± 12.3                   | <0.001                  |
| BMI, kg/m <sup>2</sup>          | 22.7 ± 3.31                       | 23.9 ± 3.22                     | 24.8 ± 3.30                     | 25.1 ± 3.52                      | 25.9 ± 3.54                   | <0.001                  |
| SBP, mmHg                       | 117.5 ± 16.9                      | 122.0 ± 16.7                    | 124.3 ± 16.7                    | 125.1 ± 16.2                     | 128.1 ± 17.4                  | <0.001                  |
| DBP, mmHg                       | 71.5 ± 10.3                       | 74.8 ± 10.6                     | 76.7 ± 10.3                     | 77.6 ± 10.0                      | 79.7 ± 11.4                   | <0.001                  |
| HR, per min                     | 74.8 ± 10.1                       | 74.1 ± 10.4                     | 74.4 ± 10.4                     | 73.9 ± 9.85                      | 74.8 ± 10.4                   | 0.87                    |
| NT-proBNP, ng/L                 | 45.1 ± 42.3                       | 47.7 ± 108                      | 42.8 ± 136                      | 39.1 ± 54.0                      | 44.1 ± 113                    | 0.27                    |
| HbA1c, mg/dL                    | 5.67 ± 0.62                       | 5.76 ± 0.84                     | 5.83 ± 0.81                     | 5.90 ± 0.99                      | 6.02 ± 1.07                   | <0.001                  |
| Fasting glucose, mg/dL          | 95.5 ± 15.1                       | 99.1 ± 19.8                     | 102.1 ± 20.7                    | 103.3 ± 25.3                     | 106.7 ± 28.4                  | <0.001                  |
| Cholesterol, mg/dL              | 198.3 ± 36.3                      | 200.3 ± 40.2                    | 203.4 ± 35.4                    | 203.3 ± 37.3                     | 201.5 ± 35.7                  | 0.01                    |
| Triglyceride, mg/dL             | 114.8 ± 105.9                     | 133.2 ± 144.5                   | 141.8 ± 90.9                    | 144.1 ± 89.3                     | 159.5 ± 115.2                 | <0.001                  |
| LDL, mg/dL                      | 123.6 ± 33.3                      | 128.4 ± 34.0                    | 132.4 ± 31.1                    | 133.4 ± 33.8                     | 132.2 ± 32.7                  | <0.001                  |
| HDL, mg/dL                      | 59.1 ± 16.0                       | 54.0 ± 14.5                     | 51.8 ± 14.2                     | 50.6 ± 13.7                      | 48.4 ± 12.8                   | <0.001                  |
| eGFR, mL/min/1.73m <sup>2</sup> | 94.1 ± 18.8                       | 89.3 ± 17.0                     | 87.315.3                        | 86.7 ± 16.7                      | 84.5 ± 16.3                   | <0.001                  |
| QRS duration, ms                | 85.9 ± 10.0                       | 88.6 ± 10.3                     | 90.0 ± 11.6                     | 91.3 ± 11.1                      | 93.4 ± 12.1                   | <0.001                  |
| Hypertension, %                 | 187 (12.7%)                       | 146 (14.9%)                     | 164 (17%)                       | 173 (20.7%)                      | 287 (27.0%)                   | <0.001                  |
| Diabetes, %                     | 68 (4.6%)                         | 50 (5.1%)                       | 64 (6.6%)                       | 59 (7.1%)                        | 103 (9.7%)                    | <0.001                  |
| Hyperlipidemia, %               | 100 (6.8%)                        | 69 (7.0%)                       | 70 (7.2%)                       | 78 (9.3%)                        | 93 (8.7%)                     | 0.02                    |
| CAD, %                          | 77 (5.2%)                         | 58 (5.9%)                       | 52 (5.4%)                       | 48 (5.7%)                        | 76 (7.1%)                     | 0.08                    |

|             |             |             |             |             |             |        |
|-------------|-------------|-------------|-------------|-------------|-------------|--------|
| Alcohol, %  | 54 (3.7%)   | 48 (4.9%)   | 70 (7.2%)   | 66 (7.9%)   | 101 (9.5%)  | <0.001 |
| Exercise, % | 216 (14.6%) | 137 (14.0%) | 135 (14.0%) | 120 (14.4%) | 157 (14.8%) | 0.91   |
| Smoking, %  | 4 (0.3%)    | 8 (0.8%)    | 4 (0.4%)    | 6 (0.7%)    | 15 (1.4%)   | 0.003  |

---

AoD: aortic root diameter; BMI: body mass index; SBP: systolic blood pressure; DBP: diastolic blood pressure; HR: heart rate; Hb: hemoglobin; WBC count: circulating white blood cell count; LDL: low-density lipoprotein; HDL: high-density lipoprotein; GPT: glutamic-pyruvate transaminase; eGFR: estimated glomerular filtration rate; CAD: coronary artery disease.

**Table S2.** NT-proBNP level and echocardiographic parameters stratified by aortic root diameter

| AoD Quintiles           | 1st Quintile<br>(n = 1481) | 2nd Quintile<br>(n=982) | 3rd Quintile<br>(n = 968) | 4th Quintile<br>(n = 1161) | 5th Quintile<br>(n = 748) | p (Trend) | Pearson's<br>Correlation | Coef  | 95% CI       | p Value |
|-------------------------|----------------------------|-------------------------|---------------------------|----------------------------|---------------------------|-----------|--------------------------|-------|--------------|---------|
| NT-proBNP, ng/L         | 45.1 ± 42.3                | 47.7 ± 108              | 42.8 ± 136                | 39.1 ± 54.0                | 44.1 ± 113                | 0.27      | -0.008                   | -1.84 | -8.56, 4.89  | 0.59    |
| IVS, mm                 | 8.47 ± 1.09                | 8.90 ± 0.95             | 9.15 ± 0.96               | 9.31 ± 0.96                | 9.61 ± 1.02               | <0.001    | 0.398                    | 1.07  | 1.00, 1.13   | <0.001  |
| PWd, mm                 | 8.48 ± 1.00                | 8.91 ± 0.89             | 9.14 ± 0.88               | 9.36 ± 1.41                | 9.61 ± 0.89               | <0.001    | 0.1395                   | 1.06  | 1.00, 1.13   | <0.001  |
| LVIDd, mm               | 44.3 ± 3.44                | 46.2 ± 3.29             | 47.3 ± 3.12               | 47.8 ± 3.35                | 48.6 ± 3.27               | <0.001    | 0.432                    | 3.91  | 3.69, 4.12   | <0.001  |
| LVMI, g/m <sup>2</sup>  | 70.0 ± 13.9                | 75.3 ± 13.4             | 77.8 ± 13.2               | 79.5 ± 13.4                | 83.2 ± 14.8               | <0.001    | 0.348                    | 12.7  | 11.7, 13.6   | <0.001  |
| RWT                     | 38.6 ± 4.9                 | 38.9 ± 4.3              | 39.1 ± 4.3                | 39.3 ± 4.5                 | 39.9 ± 4.4                | <0.001    | 0.11                     | 0.13  | 0.10, 0.16   | <0.001  |
| LVH (%)                 | 55 (3.9%)                  | 38 (4.2%)               | 32 (3.7%)                 | 26 (3.4%)                  | 40 (4.2%)                 | 0.89      | —                        | —     | —            | —       |
| EDVi                    | 39.0 ± 6.3                 | 40.5 ± 6.1              | 40.9 ± 6.0                | 41.4 ± 6.5                 | 42.0 ± 6.7                | <0.001    | 0.18                     | 0.29  | 0.24, 0.33   | <0.001  |
| LVEF, %                 | 63.2 ± 5.7                 | 63.0 ± 5.0              | 62.8 ± 5.1                | 62.1 ± 5.4                 | 62.0 ± 5.7                | <0.001    | -0.07                    | -0.10 | -0.13, -0.06 | <0.001  |
| DT, ms                  | 195.3 ± 42.4               | 200.7 ± 41.3            | 201.5 ± 39.8              | 206.6 ± 40.3               | 211.0 ± 45.3              | <0.001    | 0.136                    | 14.1  | 11.3, 16.9   | <0.001  |
| IVRT, ms                | 85.8 ± 13.4                | 87.9 ± 13.2             | 89.3 ± 13.5               | 91.0 ± 15.1                | 94.7 ± 17.8               | <0.001    | 0.225                    | 8.26  | 7.17, 9.35   | <0.001  |
| E/A ratio               | 1.33 ± 0.47                | 1.23 ± 0.41             | 1.20 ± 0.38               | 1.15 ± 0.41                | 1.07 ± 0.37               | <0.001    | -0.222                   | -0.23 | -0.26, -0.20 | <0.001  |
| TDI-s' (average), mm    | 8.24 ± 1.57                | 8.29 ± 1.53             | 8.37 ± 1.50               | 8.30 ± 1.59                | 8.24 ± 1.59               | 0.95      | 0.003                    | 0.01  | -0.09, 0.11  | 0.85    |
| LAVi, mL/m <sup>2</sup> | 16.0 ± 5.53                | 16.1 ± 5.81             | 16.8 ± 5.93               | 16.3 ± 6.22                | 17.0 ± 5.88               | <0.001    | 0.064                    | 0.94  | 0.52, 1.35   | <0.001  |
| TDI-e' (average), mm    | 9.98 ± 2.56                | 9.41 ± 2.32             | 9.18 ± 2.25               | 8.76 ± 2.26                | 8.23 ± 2.13               | <0.001    | -0.271                   | -1.61 | -1.76, -1.45 | <0.001  |
| E/e' (average)          | 7.73 ± 2.42                | 7.72 ± 2.34             | 7.86 ± 2.58               | 7.87 ± 2.53                | 8.08 ± 2.64               | <0.001    | 0.056                    | 0.35  | 0.18, 0.51   | <0.001  |
| TR velocity, m/sec      | 18.0 ± 5.27                | 18.0 ± 5.26             | 17.5 ± 5.44               | 17.6 ± 5.31                | 17.7 ± 5.51               | 0.06      | -0.023                   | -0.30 | -0.67, 0.07  | 0.11    |

AoD: aortic root diameter; ASE, American Society of Echocardiography; DT: mitral inflow deceleration time; E: early mitral inflow velocity; TDI-e': peak mitral annulus relaxation velocity e'; E/A: mitral inflow E/A ratio; E/e' mean: mean early mitral inflow E to mitral annulus relaxation velocity e' ratio; IVRT: isovolumic relaxation time; IVS: interventricular septal wall thickness; LA: left atrial/atrium; LAVi: left atrial volume index; LVIDd: LV end-diastolic diameter; LVMI: left ventricular mass index; TDI-s': peak mitral annulus systolic velocity; TR: tricuspid regurgitation; CI: confidence interval.
